# Supplementary material for: Non-Antigenic Modulation of Antigen Receptor (TCR) Cβ-FG Loop Modulates Signalling: Implications of External Factors Influencing T-Cell Responses
Source: MDPI journal article supplement (doi:10.3390/ijms24119334), 2023-05-26

## Supplementary Figures:

**Supplementary Figure 1.** Structural models of TCR and binding of lead compounds. The molecular dynamics simulation predicted 5 compounds: **(A)** oestradiol, **(B)** N-acetyl-D-tryptophan, **(C)** D,L-homotryptophan, **(D)** malonate, and **(E)** nicotine that have the best score during docking analysis using CHIMERA. **(F)** Compounds including isobutyrate, 3-indolebutyrate and propanoate have no effect on T-cell activation due to either weak binding affinity or no interaction with FG loop. The TCR- $\alpha\beta$  heterodimer complex and C $\beta$  FG loop is coloured in beige and cyan respectively.

**Supplementary Figure 2.** Initial docking screening by PyRx.

**Supplementary Figure 3.** Docking poses of compounds which were found to either have no effect on, or reduce IL-2 production in the biological assays. The active compounds were found to cluster around the outside of the FG loop. The values underneath each image are the Prime MM-GBSA dG binding scores in (kcal/mol). Hydrogen bonds, salt bridges,  $\pi$ - $\pi$  and cation- $\pi$  interactions are denoted as dashed yellow, pink, blue and green lines respectively.

**Supplementary Figure 4.** The effect of compounds on the cell viability of immune hybridoma lines. The 2B4.11 and LK35.2 hybridoma lines were cultured for 24 h in the absence or presence of the following compounds at different concentrations: 3-indolebutyrate, isobutyrate, propanoate, malonate, nicotine, oestradiol, D,L-Homotryptophan, and N-Acetyl-D-tryptophan. All the data was expressed as mean  $\pm$ SD, n = 3.

Supplementary Figure 1

**A Oestradiol**

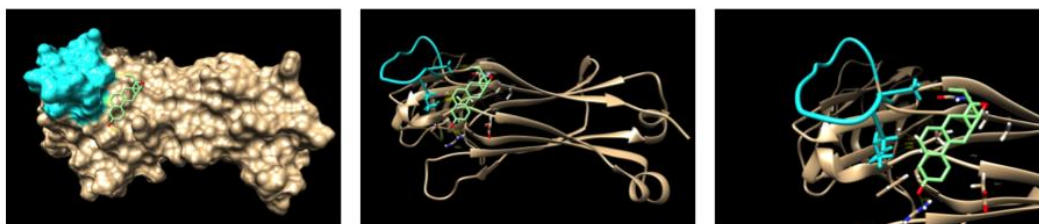

**B N-acetyl tryptophan**

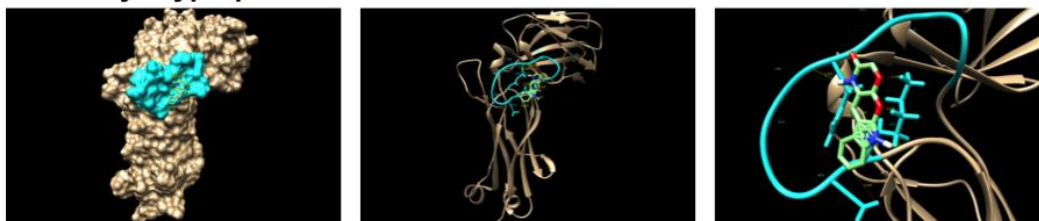

**C D,L-homotryptophan**

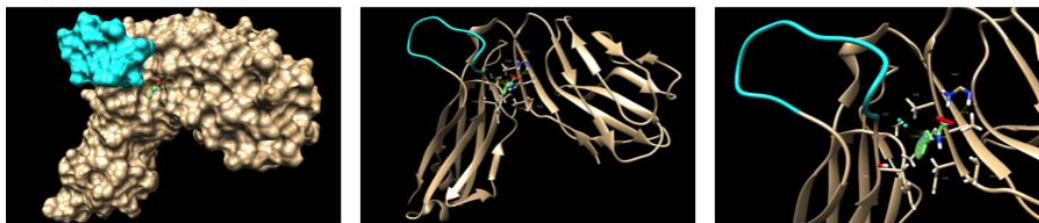

**D Malonate**

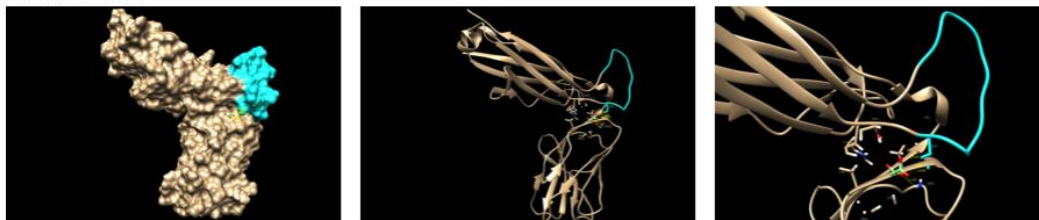

**E Nicotine**

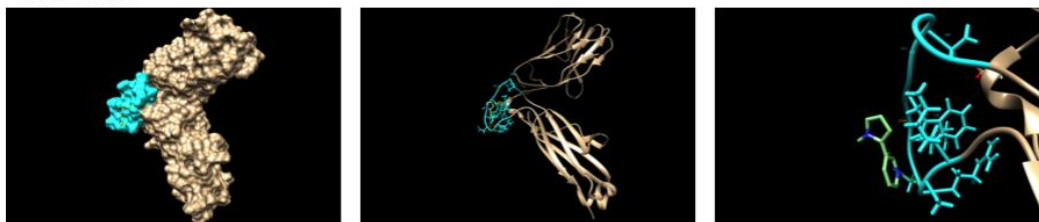

**F Isobutyric acid**

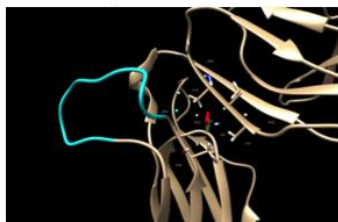

**3-indole-butyric acid**

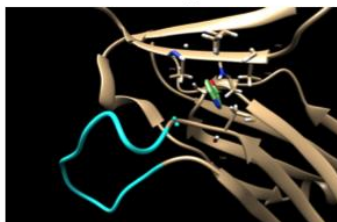

**Propanoate**

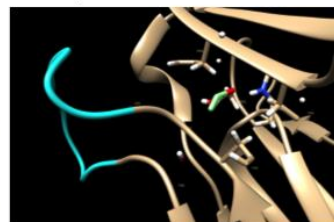

Supplementary Figure 2

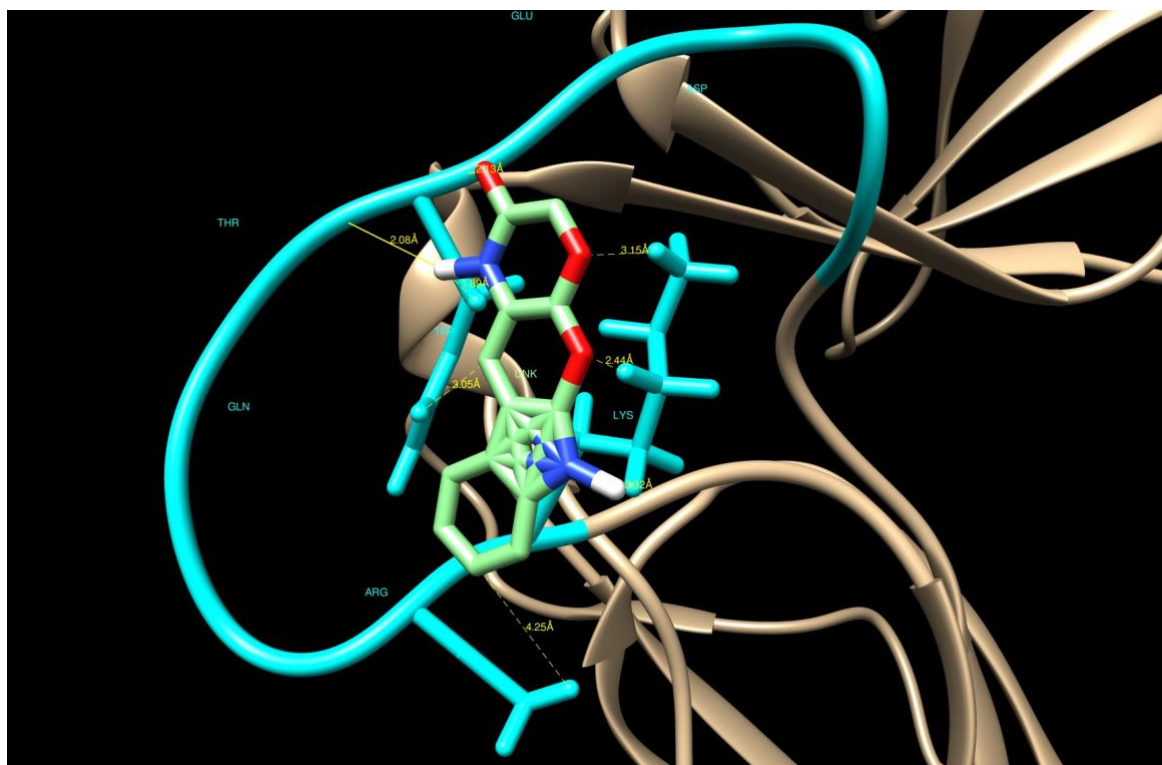

N-Acetyl-Tryptophan, showing distance of H-bond to FG loop residues (yellow line).

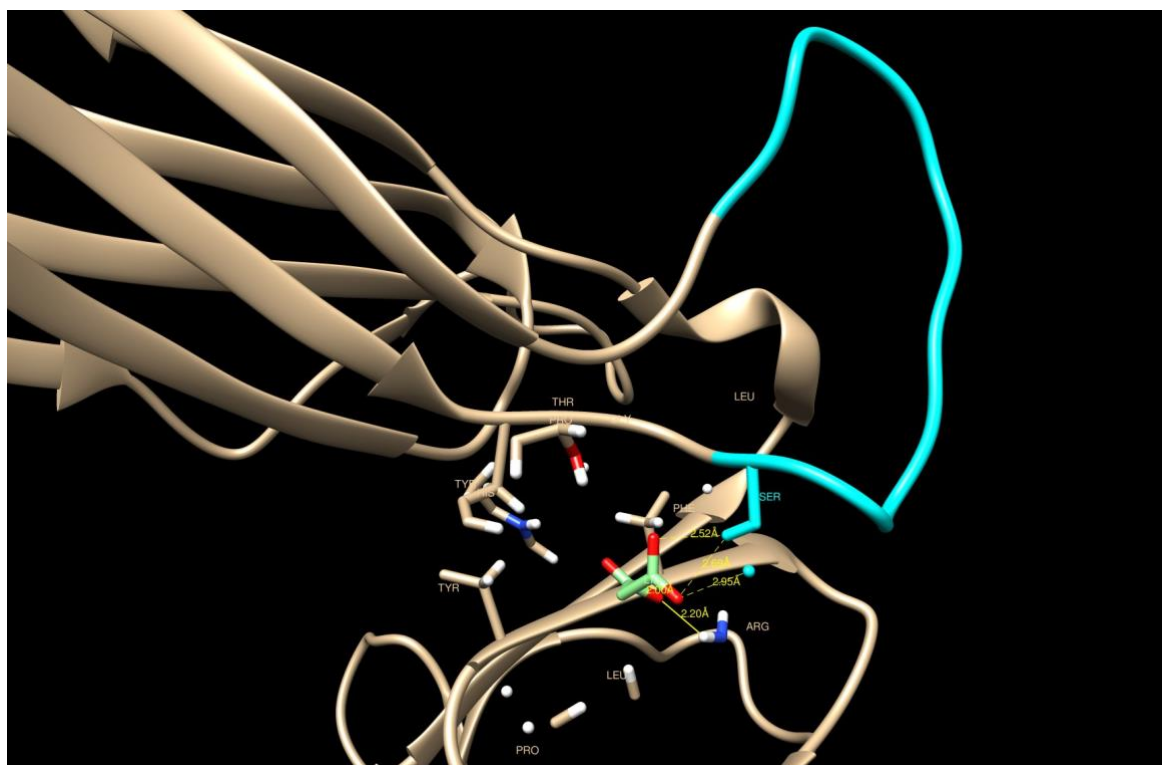

Malonic acid, showing distance of H-bond to FG loop residues (yellow line).

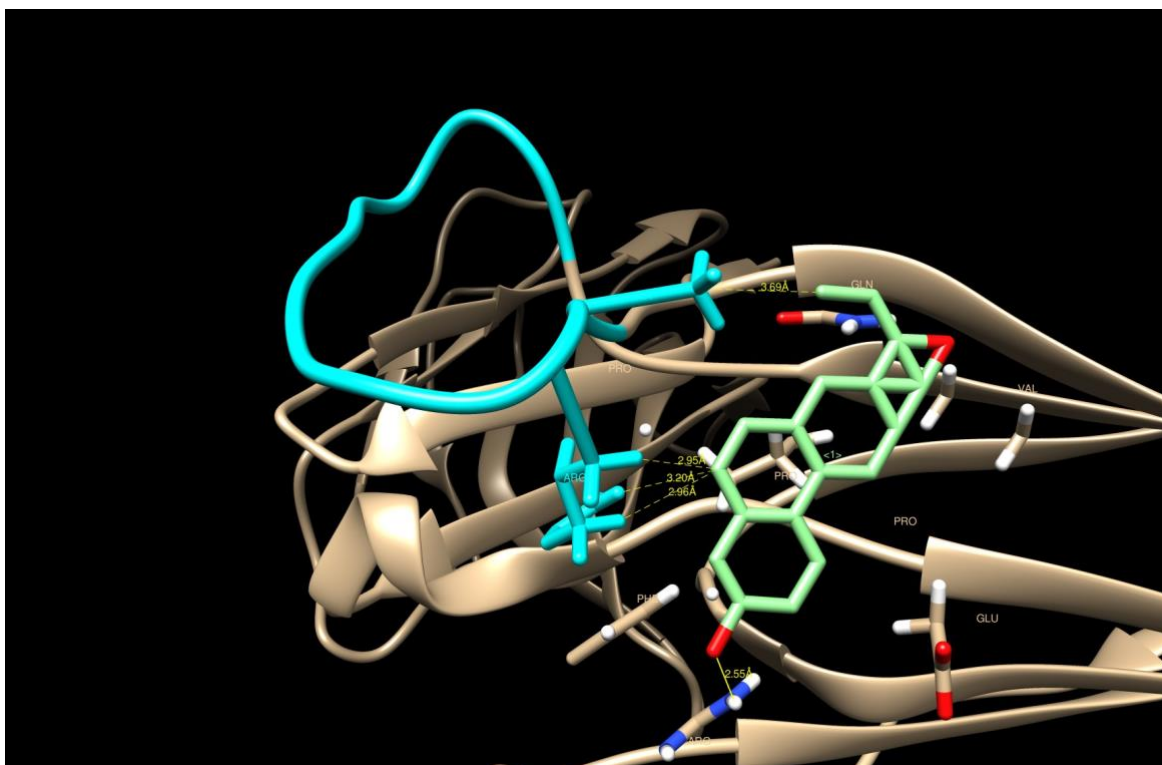

Oestradiol, showing distance of H-bond to FG loop residues (yellow line).

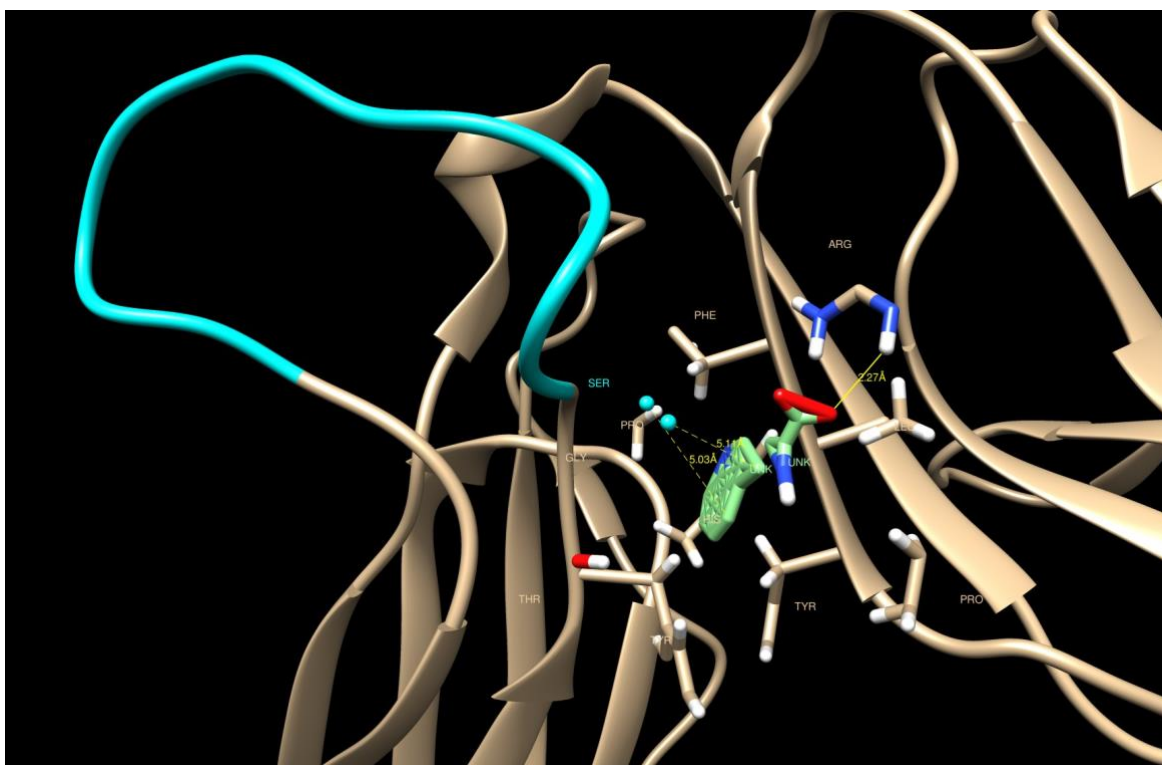

D,L-homotryptophan, showing distance of H-bond to FG loop residues (yellow line).



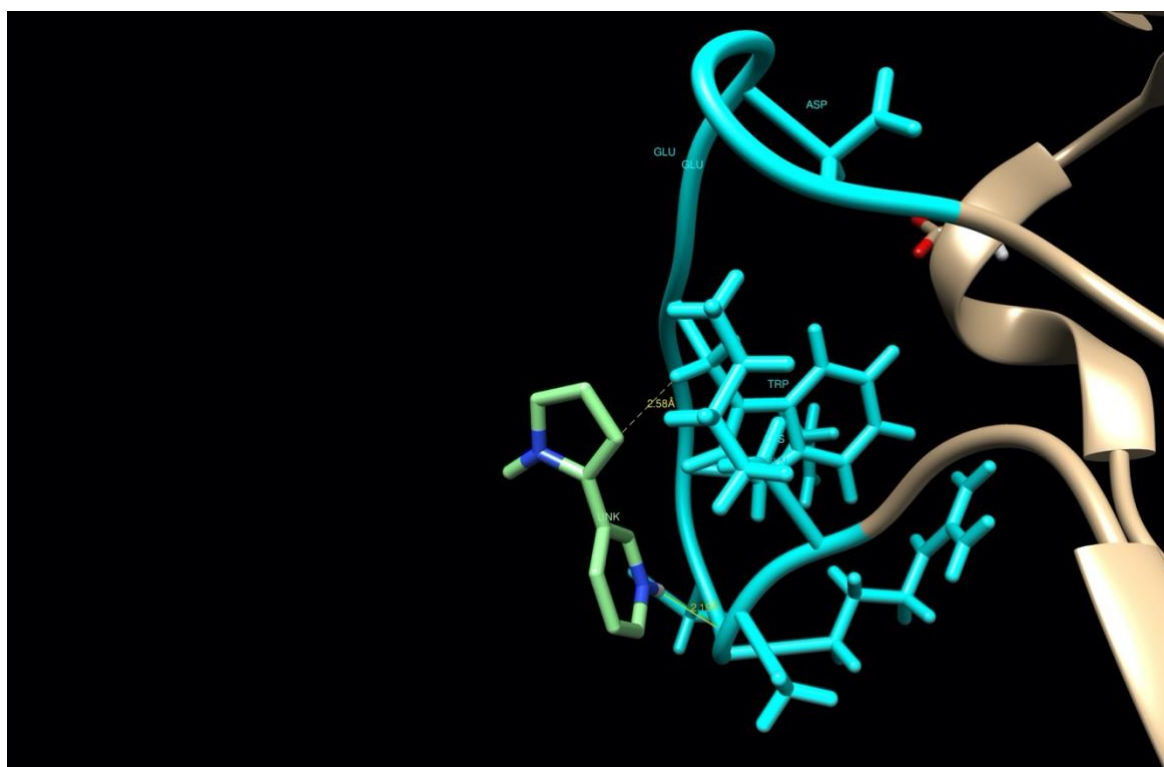

Nicotine, showing distance of H-bond to FG loop residues (yellow line).

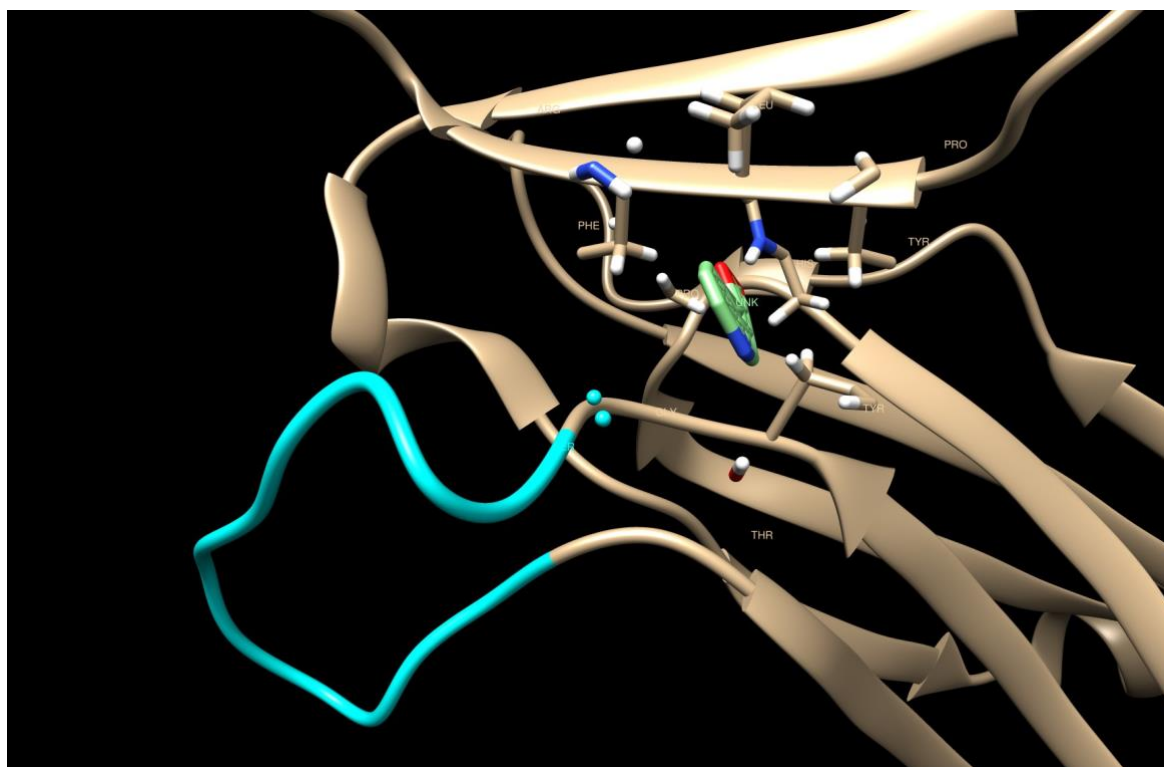

Indole-3-Butyric Acid, showing no H-bond to FG loop residues.

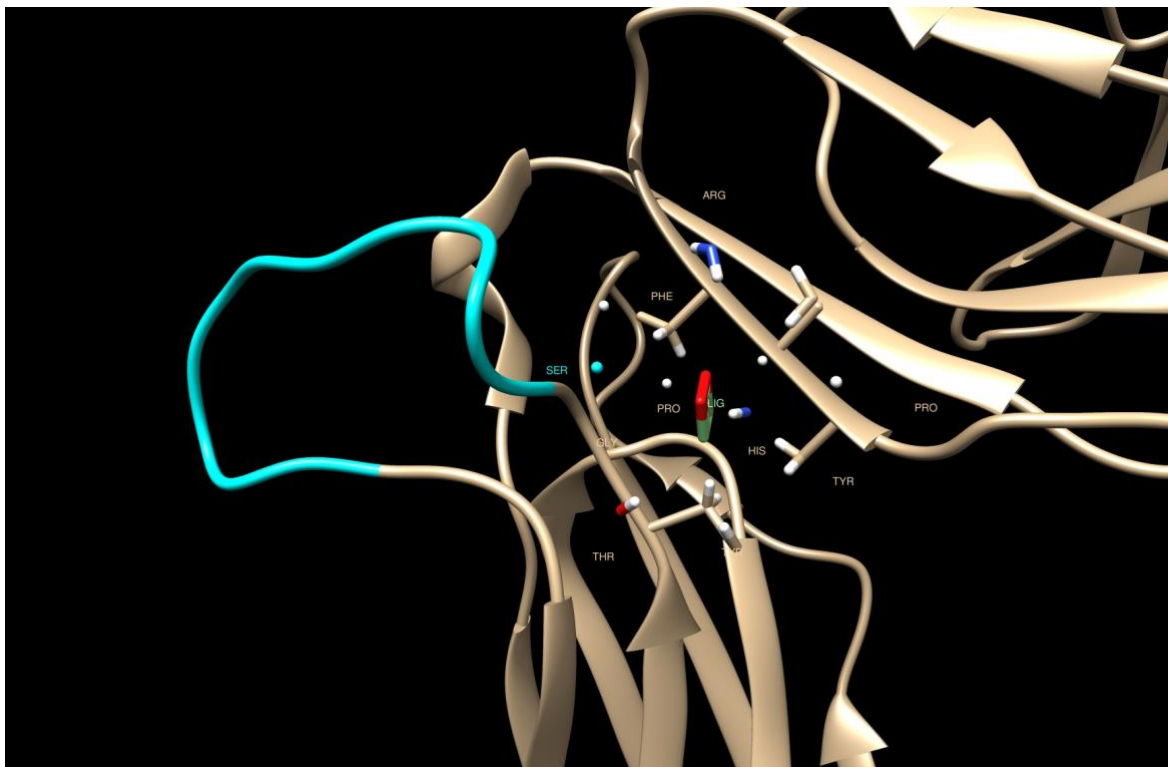

Isobutyric acid, showing no H-bond to FG loop residues.

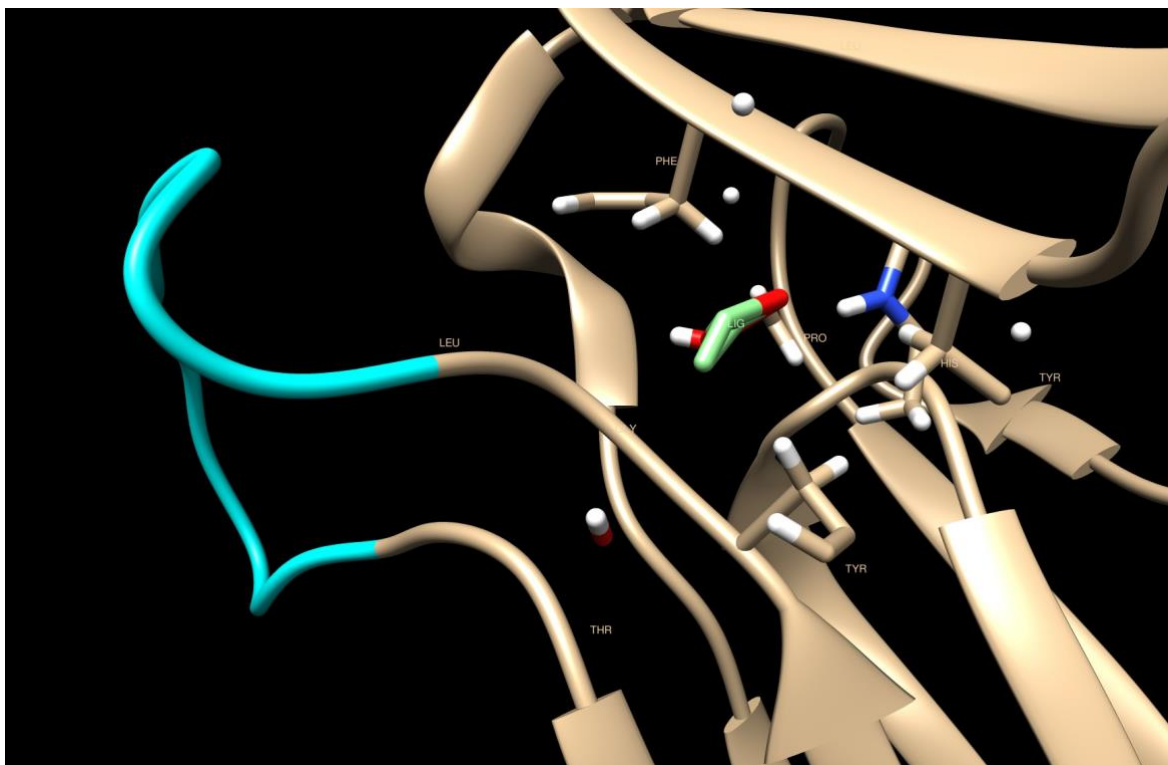

Propanoic acid, showing no H-bond to FG loop residues.

Supplementary Figure 3.

| Ligand    |                                                                                    |  |  |
|-----------|------------------------------------------------------------------------------------|--|--|
| estradiol | 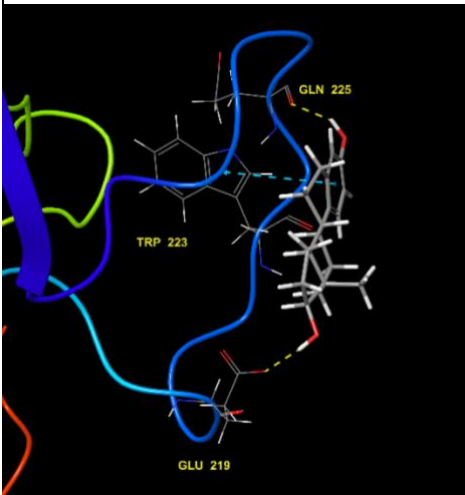  |  |  |
| sucrose   |  |  |  |

|                |                                                                                     |                                                                                    |       |
|----------------|-------------------------------------------------------------------------------------|------------------------------------------------------------------------------------|-------|
| aspartame      | 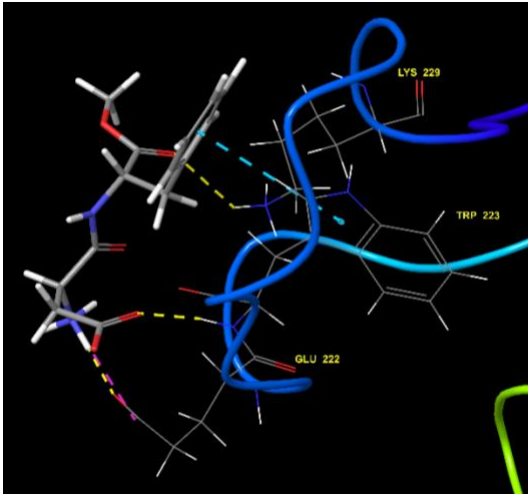   |                                                                                    |       |
|                | -27.9                                                                               |  | -16.7 |
| butanediol     |   |                                                                                    |       |
|                | -21.1                                                                               |                                                                                    |       |
| indolebutyrate |  |                                                                                    |       |
|                | -20.9                                                                               |                                                                                    |       |



|                |                                                                                     |                                                                                     |  |
|----------------|-------------------------------------------------------------------------------------|-------------------------------------------------------------------------------------|--|
| nicotine       | 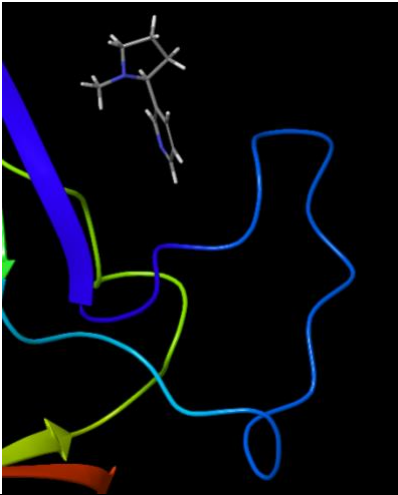   |   |  |
|                | -20.6                                                                               | -15.3                                                                               |  |
| homotryptophan |   |  |  |
|                | -18.3                                                                               | -17.2                                                                               |  |
| NAD_tryptophan |  |                                                                                     |  |
|                | -17.3                                                                               |                                                                                     |  |

|           |                                                                                     |                                                                                      |
|-----------|-------------------------------------------------------------------------------------|--------------------------------------------------------------------------------------|
| glycerol  | 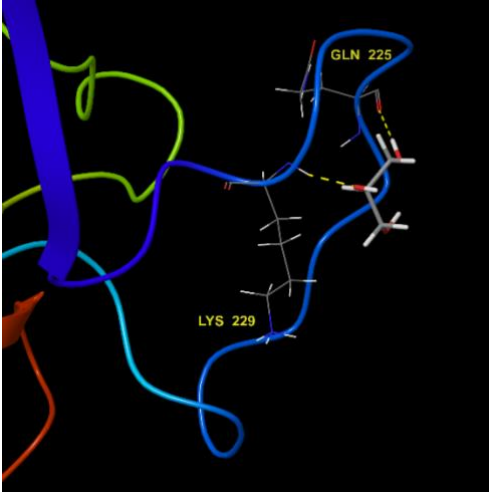   |                                                                                      |
|           | -13.8                                                                               |                                                                                      |
| malonic   |   |  |
|           | -9.7                                                                                | 0.6                                                                                  |
| propanoic |  |                                                                                      |
|           | -5.5                                                                                |                                                                                      |

|             |                                                                                   |  |  |
|-------------|-----------------------------------------------------------------------------------|--|--|
| isobutyrate | 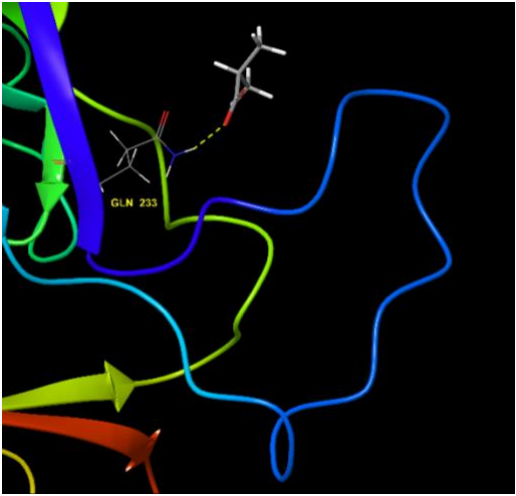 |  |  |
|             | -4.5                                                                              |  |  |

Supplementary Figure 4

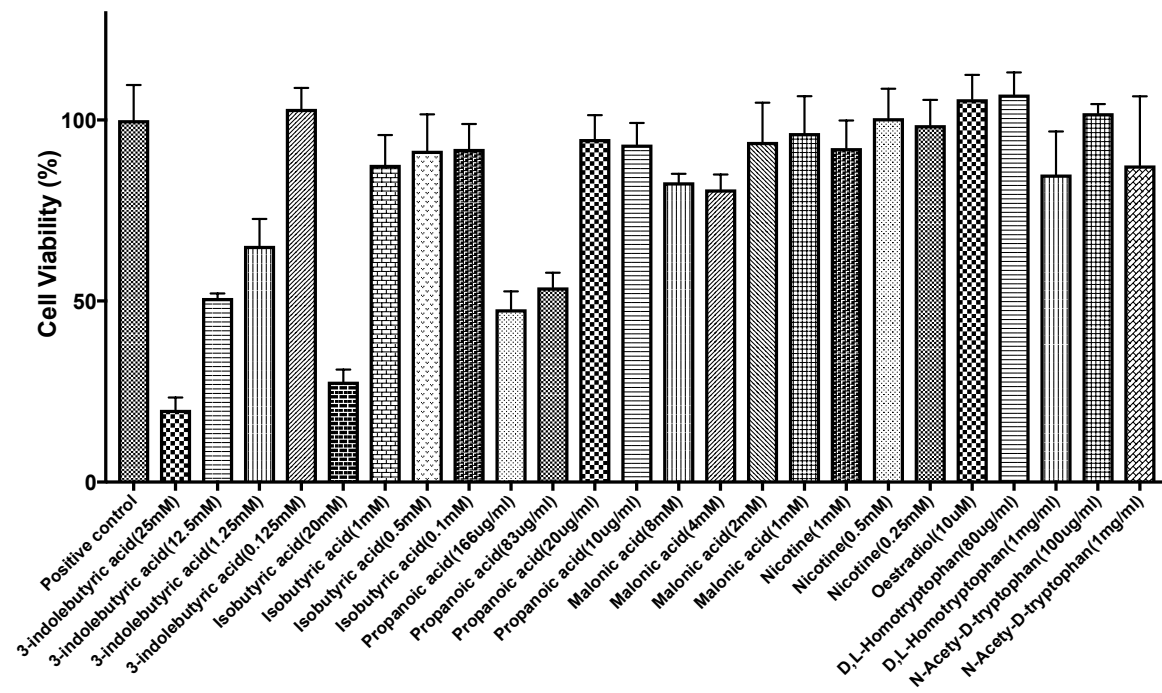

Supplement: s1 [file s1]
