# Supplementary material for: Non-Antigenic Modulation of Antigen Receptor (TCR) Cβ-FG Loop Modulates Signalling: Implications of External Factors Influencing T-Cell Responses
Source: MDPI journal article supplement (doi:10.3390/ijms24119334), 2023-05-26
Supplement: s1 [file s1]

## Supplementary Table 1

**Table 1. The list of compound libraries and databases.**

| Compound library  | Database website                                                                                | Origin          |
|-------------------|-------------------------------------------------------------------------------------------------|-----------------|
| BindingDB         | <a href="https://www.bindingdb.org/bind/index.jsp">https://www.bindingdb.org/bind/index.jsp</a> | UCSD, USA       |
| ChEMBL model      | <a href="https://www.ebi.ac.uk/chembl/target">https://www.ebi.ac.uk/chembl/target</a>           | EBI, UK         |
| Drug bank         | <a href="https://www.drugbank.ca/">https://www.drugbank.ca/</a>                                 | Alberta, Canada |
| KEGG compound     | <a href="http://www.genome.jp/kegg/compound/">http://www.genome.jp/kegg/compound/</a>           | Kyoto, Japan    |
| KEGG drug         | <a href="http://www.genome.jp/kegg/drug/">http://www.genome.jp/kegg/drug/</a>                   | Kyoto, Japan    |
| NCI open database | <a href="https://cactus.nci.nih.gov/download/nci/">https://cactus.nci.nih.gov/download/nci/</a> | NIH, USA        |
| ZINC 8            | <a href="https://zinc8.docking.org/">https://zinc8.docking.org/</a>                             | UCSF, USA       |

**Supplementary Table 2.**

**List of 100 final ranked compounds from seven screened public libraries.**

| ID           | Name                                              | Database   |
|--------------|---------------------------------------------------|------------|
|              |                                                   | KEGG       |
| C11284       | Indolebutyric acid / Indole-3-butyric acid        | compounds  |
| DB02740      | 3-Indolebutyric                                   | ZINC8DB    |
|              | N-[3-bromophenyl]-1-[4-chlorophenyl]-6-methyl-1H- | NCI open   |
| NSC_003130   | pyrazolo[3,4-d]pyrimidin-4-amine                  | cactus     |
| ZINC00057378 | Indole-3-butyric acid                             | 12M        |
|              |                                                   | NCI open   |
| NSC_520394   | methyl 4-[1H-indol-3-yl]butanoate                 | cactus     |
| ZINC00410211 | Methyl 4-[1H-Indol-3-yl]butanoate                 | 12M        |
|              | Glycerol;Glycerin;1,2,3-Trihydroxypropane;1,2,3-  | KEGG       |
| C00116       | Propanetriol                                      | compounds  |
|              |                                                   | KEGG       |
| C02773       | 1-Alkyl-sn-glycerol; 1-O-Alkyl-sn-glycerol        | compounds  |
|              | COCA-GLYCERINE CONTROL [Antigen                   |            |
| D00028       | Laboratories]                                     | KEGG Drugs |
| D05073       | Monoctanoin [USAN]; Moctanin [TN]                 | KEGG Drugs |
| DB04077      | Glycerol                                          | ZINC8DB    |
|              |                                                   | NCI open   |
| NSC_009230   | glycerol                                          | cactus     |
|              |                                                   | NCI open   |
| NSC_403834   | 2-methyl-1,2,3-propanetriol                       | cactus     |
| ZINC37632578 | 5-[1H-indol-3-yl]pentanoic                        | 12M        |
|              |                                                   | NCI open   |
| NSC_615268   | C38H69N13O14                                      | cactus     |
| ZINC02566960 | 6-[1H-indol-3-yl]hexanoic acid                    | 12M        |
| ZINC37632580 | 7-[1H-indol-3-yl]heptanoic                        | 12M        |
| ZINC37632582 | 9-[1H-indol-3-yl]nonanoic                         | 12M        |
| DB02418      | [R,R]-2,3-Butanediol                              | ZINC8DB    |
|              |                                                   | GLIDA ZINC |
| L002272      | C40 H73 N11 O12 S                                 | 8          |
|              |                                                   | NCI open   |
| NSC_158562   | ethyl 4-[1H-indol-3-yl]butanoate                  | cactus     |

|              |                                                         |          |      |
|--------------|---------------------------------------------------------|----------|------|
|              |                                                         | NCI      | open |
| NSC_520393   | isopropyl 4-[1H-indol-3-yl]butanoate                    | cactus   |      |
| ZINC00259399 | ethyl 4-[1H-indol-3-yl]butanoate                        | 12M      |      |
|              |                                                         | KEGG     |      |
| C03137       | N-Acetyl-D-tryptophan                                   | Compound |      |
| ZINC47311811 | propyl 4-[1H-indol-3-yl]butanoate                       | 12M      |      |
|              | [2S]-2-[[[2S]-1-[[2S]-2-[[[2S,3S]-2-[[[2S]-2-[[[2S]-2-  | Zinc     |      |
| BDB0003879   | acetamido-4-hydroxy-4-oxo-butanoyl]amino]-4-hy          | 26376588 |      |
| DB02531      | Isobutyric                                              | Zinc 8   |      |
| DB03766      | Propanoic                                               | Zinc 8   |      |
|              |                                                         | KEGG     |      |
| C02170       | Methylmalonate; Methylmalonic acid                      | Compound |      |
|              |                                                         | KEGG     |      |
| C06388       | 2-Aryl-2-methylmalonate                                 | Compound |      |
| DB02175      | Malonic                                                 | Zinc 8   |      |
| DB02201      | Malonate                                                | Zinc 8   |      |
| DB04183      | Methylmalonic                                           | Zinc 8   |      |
|              | Dimethylmalonic acid; Malonic acid, dimethyl-2,2-       | NCI      | open |
| NSC_000836   | Propanedicarboxylic acid                                | cactus   |      |
|              | Isosuccinic acid; Malonic acid, methyl-Methylmalonic    |          |      |
|              | acid; Propanedioic acid, methyl-1, 1-Ethanedicarboxylic | NCI      | open |
| NSC_025201   | acid                                                    | cactus   |      |
|              |                                                         | NCI      | open |
| NSC_120443   | Methanetricarboxylic acid                               | cactus   |      |
|              |                                                         | NCI      | open |
| NSC_154847   | cis-Diammine[methylmalonato]platinum[II]                | cactus   |      |
|              |                                                         | NCI      | open |
| NSC_154848   | Platinum, [ethylenediamino][methylmalonato]-            | cactus   |      |
|              | CC[C][C[O]=O]C[=O][OH+][Co+3][N][N][N][N]N.[O-          | NCI      | open |
| NSC_175779   | ][Cl][=O][=O]=O                                         | cactus   |      |
|              |                                                         | NCI      | open |
| NSC_215156   | cis-Diammine[methylmalonato]platinum[II]                | cactus   |      |
| ZINC02566035 | D,L-Homotryptophan                                      | 12M      |      |

|              |                                                          |              |
|--------------|----------------------------------------------------------|--------------|
|              | [S]-4-[INDOL-3-YL]-BETA-HOMOALANINE                      |              |
| ZINC04240327 | HYDROCHLORIDE                                            | 12M          |
|              | [R]-3-Amino-4-[1H-indol-3-yl]butanoic acid               |              |
| ZINC04521117 | hydrochloride                                            | 12M          |
| ZINC06864822 | D,L-Homotryptophan                                       | 12M          |
|              |                                                          | KEGG         |
| C01083       | alpha,alpha-Trehalose; alpha,alpha'-Trehalose; Trehalose | Compound     |
|              | Diethylene glycol; 2,2'-Oxydiethanol; 1,5-Dihydroxy-3-   | KEGG         |
| C14689       | oxapentane                                               | Compound     |
|              |                                                          | NCI open     |
| NSC_036391   | Diethylene glycol                                        | cactus       |
|              | 2-[hydroxymethyl]-5-[1,2,4-triazol-1-                    |              |
| ZINC05082162 | yl]tetrahydrofuran-3,4-diol                              | Zinc 8       |
|              | 29-amino-2,23-bis[4-aminobutyl]-26-sec-butyl-11-         |              |
|              | [carboxymethyl]-14,17-bis[1-hydroxyethyl]-8-isobutyl-    |              |
|              | 4,7,10,13,16,19,22,25,28-nonaoxo-                        |              |
|              | 3,6,9,12,15,18,21,24,27-nonaazadotriacontane-1,32-       | NCI open     |
| NSC_631177   | dioic acid [ACD/Name 4.0]                                | cactus       |
| L002222      | L002222                                                  | Glida Zinc 8 |
| D08904       | Diethylene glycol monoethyl ether [NF]                   | KEGG Drug    |
| DB02327      | 2-[2-[2-Hydroxy-Ethoxy]-Ethoxy]-Ethanol                  | Zinc 8       |
| DB02343      | 3,6,9,12,15-Pentaoxaheptadecane                          | Zinc 8       |
|              | 1-[2-Methoxy-Ethoxy]-2-[2-[2-Methoxy-Ethoxy]-            |              |
| DB02580      | Ethoxy]-Ethane                                           | Zinc 8       |
| DB02935      | 1-Methoxy-2-[2-Methoxyethoxy]Ethane                      | Zinc 8       |
| DB03508      | 1-Ethoxy-2-[2-Methoxyethoxy]Ethane                       | Zinc 8       |
|              | 2-[2-[2-[2-[2-[2-[2-Ethoxy-Ethoxy]-Ethoxy]-              |              |
| DB03556      | Ethoxy}-Ethoxy]-Ethoxy]-Ethoxy}-Ethoxy]-Ethanol,         | Zinc 8       |
| DB04332      | 2-[2-[2-2-[Methoxy-Ethoxy]-Ethoxy]-Ethoxy]-Ethanol       | Zinc 8       |
| DB06867      | 3,6,9,12,15,18-HEXAOSAICOSANE                            | Zinc 8       |
| DB07344      | 3,6,9,12,15-PENTAOXAHEPTADECAN-1-OL                      | Zinc 8       |
| DB08357      | 1-ETHOXY-2-[2-ETHOXYETHOXY]ETHANE                        | Zinc 8       |

|              |                                                       |              |      |
|--------------|-------------------------------------------------------|--------------|------|
|              | tetrabromostannane compound with 1,4,7,10-            | NCI          | open |
| NSC_363142   | tetraoxacyclododecane [1:1] [ACD/Name 4.0]            | cactus       |      |
|              | Stannane, dichlorodiphenyl-, compd. with 1,4,7,10,13, | NCI          | open |
| NSC_363143   | 16-hexaoxacyclooctadecane [1:1]                       | cactus       |      |
|              | Stannane, dichlorodimethyl-, compd. with 1,4,7,10,13, | NCI          | open |
| NSC_363144   | 16-hexaoxacyclooctadecane [1:1]                       | cactus       |      |
|              |                                                       | NCI          | open |
| NSC_408451   | Carbitol                                              | cactus       |      |
|              |                                                       | NCI          | open |
| NSC_631895   | 18-Crown-6-tetrachloroplatinum[IV]                    | cactus       |      |
|              |                                                       | NCI          | open |
| NSC_632590   | 18-Crown-6-tantalum[V]pentachloride                   | cactus       |      |
|              |                                                       | NCI          | open |
| NSC_632592   | 18-Crown-6-tantalum[V]pentachloride                   | cactus       |      |
| ZINC01690436 | 2,2'-[Ethane-1,2-diylbis[oxy]]diethanol               | Zinc 8       |      |
|              |                                                       | KEGG         |      |
| C00089       | sucrose                                               | Compound     |      |
|              | alpha-D-Aldosyl beta-D-fructoside; alpha-D-Aldosyl1   | KEGG         |      |
| C04219       | beta-D-fructoside; alpha-D-Aldosyl2 beta-D-fructoside | Compound     |      |
|              |                                                       | KEGG         |      |
| C07314       | Sucalfate                                             | Compound     |      |
| D00025       | Suc                                                   | KEGG Drug    |      |
| D00446       | Sucalfate [USP/INN]                                   | KEGG Drug    |      |
| L000836      | Cocaine                                               | Glida Zinc 8 |      |
| BDB0017292   | Estradiol                                             | zinc13520815 |      |
|              | [E]-3-cyclopropyl-N-methyl-3-[[2R]-oxiran-2-yl]prop-  |              |      |
| BDB0017294   | 2-en-1-amine                                          | zinc14963904 |      |
| BDB0020624   | Estradiol                                             | Zinc 3815415 |      |
|              |                                                       | Zinc         |      |
| BDB0022422   | Estradiol                                             | 13420815     |      |
|              |                                                       | Zinc         |      |
| BDB0023952   | Estradiol                                             | 13420815     |      |

|            |                                                         |              |
|------------|---------------------------------------------------------|--------------|
|            |                                                         | Zinc         |
| BDB0025868 | Estradiol                                               | 13420815     |
|            |                                                         | KEGG         |
| C00951     | Estradiol-17beta; Estradiol; beta-Estradiol             | Compound     |
|            |                                                         | KEGG         |
| C02537     | Estradiol-17alpha; 17alpha-Estradiol                    | Compound     |
|            |                                                         | KEGG         |
| C14483     | 17alpha-Methylestradiol                                 | Compound     |
|            | Estra-1,3,5[10]-triene-2,17beta-diol; 2-Hydroxy-3-      | KEGG         |
| C15129     | deoxyestradiol                                          | Compound     |
|            |                                                         | KEGG         |
| C15261     | Estra-1,3,5[10]-triene-3,16beta-diol; 16beta-Estradiol  | Compound     |
| D00105     | Sucrose                                                 | KEGG Drug    |
| D07121     | Alfatradiol [INN] 17alpha-Estradiol                     | KEGG Drug    |
| L024123    | Estradiol                                               | Glida Zinc 8 |
|            |                                                         | KEGG         |
| C11045     | Aspartame                                               | Compound     |
| D02381     | Aspartame [NF/INN]                                      | KEGG Drug    |
| D08862     | Aspartame acesulfame [NF]                               | KEGG Drug    |
| L001103    | Aspartame                                               | Glida Zinc 8 |
|            | [4S]-4-[[[2S,3S]-2-acetamido-3-methyl-                  |              |
|            | pentanoyl]amino]-5-[[[1S,2S]-1-[[[1S]-1-formyl-3-       |              |
| BDB0010357 | hydroxy-3-oxo                                           | Zinc14947180 |
|            | Nicotine; [S]-3-[1-Methylpyrrolidin-2-yl]pyridine; [S]- | KEGG         |
| C00745     | Nicotine                                                | Compound     |
|            |                                                         | KEGG         |
| C16150     | R,S]-Nicotine; [+]-3-[1-Methyl-2-pyrrolidinyl]pyridine  | Compound     |
|            |                                                         | KEGG         |
| C16386     | [R]-Nicotine; D-Nicotine; 2'-beta-H-Nicotine            | Compound     |
| D03365     | Nicotine [USP]                                          | KEGG Drug    |
| D05156     | Nicotine bitartrate [USAN]                              | KEGG Drug    |

---

**Supplementary Table 3**

Statistical analysis of cytokine assay results



| Dunnett's multiple comparisons test        | Mean Diff.   | 95.00 CI of diff.       | Summary   | Adjusted P Value |                               |
|--------------------------------------------|--------------|-------------------------|-----------|------------------|-------------------------------|
| <b>IL2</b>                                 |              |                         |           |                  |                               |
| Positive vs. Oestradiol(10uM)              | 628.9        | 560 to 697.8            | ****      | 0.0001           | Oestradiol(10uM)              |
| Positive vs. 3-indolebutyric acid (0.5mM)  | 49           | -19.86 to 117.9         | ns        | 0.2784           | 3-indolebutyric acid (0.5mM)  |
| Positive vs. Aspartame(1mg/ml)             | 96.1         | 27.24 to 165            | **        | 0.0028           | Aspartame(1mg/ml)             |
| Positive vs. Butanediol (0.175%)           | 92.3         | 23.44 to 161.2          | **        | 0.0043           | Butanediol (0.175%)           |
| Positive vs. D,L-Homotryptophan (1mg/ml)   | 316.5        | 247.6 to 385.4          | ****      | 0.0001           | D,L-Homotryptophan (1mg/ml)   |
| Positive vs. Glycerol (1mM)                | 104.8        | 35.94 to 173.7          | **        | 0.001            | Glycerol (1mM)                |
| Positive vs. Isobutyric acid (0.5mM)       | 40.9         | -27.96 to 109.8         | ns        | 0.4802           | Isobutyric acid (0.5mM)       |
| Positive vs. Malonic acid (1mM)            | 47.5         | -21.36 to 116.4         | ns        | 0.3103           | Malonic acid (1mM)            |
| Positive vs. N-Acety-D-tryptophan (1mg/ml) | 118.2        | 49.34 to 187.1          | ***       | 0.0002           | N-Acety-D-tryptophan (1mg/ml) |
| Positive vs. Nicotine (0.5mM)              | 91.9         | 23.04 to 160.8          | **        | 0.0045           | Nicotine (0.5mM)              |
| <b>Positive vs. Oxaliplatin(1ng/ml)</b>    | <b>-93.1</b> | <b>-164.9 to -21.32</b> | <b>**</b> | <b>0.0059</b>    | <b>Oxaliplatin(1ng/ml)</b>    |
| Positive vs. Propanoic acid (10ug/ml)      | 43.3         | -25.56 to 112.2         | ns        | 0.4133           | Propanoic acid (10ug/ml)      |
| Positive vs. Sucrose (0.01%)               | 83.8         | 14.94 to 152.7          | *         | 0.0108           | Sucrose (0.01%)               |
|                                            |              |                         |           |                  |                               |
| <b>IL6</b>                                 |              |                         |           |                  |                               |
| Positive vs. 3-indolebutyric acid (0.5mM)  | -33.3        | -96.4 to 29.8           | ns        | 0.6035           | 3-indolebutyric acid (0.5mM)  |
| Positive vs. Aspartame(1mg/ml)             | -20.1        | -83.2 to 43             | ns        | 0.958            | Aspartame(1mg/ml)             |
| Positive vs. Butanediol (0.175%)           | 11.7         | -51.4 to 74.8           | ns        | 0.9991           | Butanediol (0.175%)           |
| Positive vs. D,L-Homotryptophan (1mg/ml)   | -29.5        | -92.6 to 33.6           | ns        | 0.7302           | D,L-Homotryptophan (1mg/ml)   |
| Positive vs. Glycerol (1mM)                | 26.7         | -36.4 to 89.8           | ns        | 0.817            | Glycerol (1mM)                |
| Positive vs. Isobutyric acid (0.5mM)       | 16.7         | -46.4 to 79.8           | ns        | 0.9886           | Isobutyric acid (0.5mM)       |
| Positive vs. Malonic acid (1mM)            | -55          | -118.1 to 8.1           | ns        | 0.1119           | Malonic acid (1mM)            |
| Positive vs. N-Acety-D-tryptophan (1mg/ml) | -24.1        | -87.2 to 39             | ns        | 0.8852           | N-Acety-D-tryptophan (1mg/ml) |
| Positive vs. Nicotine (0.5mM)              | -11.6        | -74.7 to 51.5           | ns        | 0.9992           | Nicotine (0.5mM)              |
| Positive vs. Oxaliplatin(1ng/ml)           | 3.4          | -59.7 to 66.5           | ns        | 0.9998           | Oxaliplatin(1ng/ml)           |

|                                                   |              |                         |          |               |                                      |
|---------------------------------------------------|--------------|-------------------------|----------|---------------|--------------------------------------|
| Positive vs. Propanoic acid (10ug/ml)             | 15           | -48.1 to 78.1           | ns       | 0.9923        | Propanoic acid (10ug/ml)             |
| Positive vs. Sucrose (0.01%)                      | 23.4         | -39.7 to 86.5           | ns       | 0.9009        | Sucrose (0.01%)                      |
|                                                   |              |                         |          |               |                                      |
|                                                   |              |                         |          |               |                                      |
| <b>IL10</b>                                       |              |                         |          |               |                                      |
| Positive vs. 3-indolebutyric acid (0.5mM)         | -38.3        | -128.3 to 51.67         | ns       | 0.8122        | 3-indolebutyric acid (0.5mM)         |
| Positive vs. Aspartame(1mg/ml)                    | -4.5         | -94.47 to 85.47         | ns       | 0.9998        | Aspartame(1mg/ml)                    |
| Positive vs. Butanediol (0.175%)                  | 10.8         | -79.17 to 100.8         | ns       | 0.9995        | Butanediol (0.175%)                  |
| Positive vs. D,L-Homotryptophan (1mg/ml)          | -89.5        | -179.5 to 0.4717        | ns       | 0.0517        | D,L-Homotryptophan (1mg/ml)          |
| Positive vs. Glycerol (1mM)                       | 10.8         | -79.17 to 100.8         | ns       | 0.9995        | Glycerol (1mM)                       |
| Positive vs. Isobutyric acid (0.5mM)              | -23.3        | -113.3 to 66.67         | ns       | 0.9899        | Isobutyric acid (0.5mM)              |
| Positive vs. Malonic acid (1mM)                   | -10          | -99.97 to 79.97         | ns       | 0.9996        | Malonic acid (1mM)                   |
| Positive vs. N-Acety-D-tryptophan (1mg/ml)        | -43.8        | -133.8 to 46.17         | ns       | 0.6899        | N-Acety-D-tryptophan (1mg/ml)        |
| Positive vs. Nicotine (0.5mM)                     | 10.8         | -79.17 to 100.8         | ns       | 0.9995        | Nicotine (0.5mM)                     |
| Positive vs. Oxaliplatin(1ng/ml)                  | 10.8         | -79.17 to 100.8         | ns       | 0.9995        | Oxaliplatin(1ng/ml)                  |
| Positive vs. Propanoic acid (10ug/ml)             | -18.3        | -108.3 to 71.67         | ns       | 0.9966        | Propanoic acid (10ug/ml)             |
| Positive vs. Sucrose (0.01%)                      | 10.8         | -79.17 to 100.8         | ns       | 0.9995        | Sucrose (0.01%)                      |
|                                                   |              |                         |          |               |                                      |
|                                                   |              |                         |          |               |                                      |
| <b>IFN gamma</b>                                  |              |                         |          |               |                                      |
| Positive vs. 3-indolebutyric acid (0.5mM)         | -0.6         | -70.62 to 69.42         | ns       | 0.9999        | 3-indolebutyric acid (0.5mM)         |
| Positive vs. Aspartame(1mg/ml)                    | -34          | -104 to 36.02           | ns       | 0.6926        | Aspartame(1mg/ml)                    |
| Positive vs. Butanediol (0.175%)                  | 27.9         | -42.12 to 97.92         | ns       | 0.8595        | Butanediol (0.175%)                  |
| Positive vs. D,L-Homotryptophan (1mg/ml)          | 34.7         | -35.32 to 104.7         | ns       | 0.6716        | D,L-Homotryptophan (1mg/ml)          |
| Positive vs. Glycerol (1mM)                       | -0.9         | -70.92 to 69.12         | ns       | 0.9999        | Glycerol (1mM)                       |
| Positive vs. Isobutyric acid (0.5mM)              | 0.9          | -69.12 to 70.92         | ns       | 0.9999        | Isobutyric acid (0.5mM)              |
| Positive vs. Malonic acid (1mM)                   | -10.9        | -80.92 to 59.12         | ns       | 0.9993        | Malonic acid (1mM)                   |
| <b>Positive vs. N-Acety-D-tryptophan (1mg/ml)</b> | <b>-73.9</b> | <b>-143.9 to -3.877</b> | <b>*</b> | <b>0.0346</b> | <b>N-Acety-D-tryptophan (1mg/ml)</b> |
| Positive vs. Nicotine (0.5mM)                     | -27.8        | -97.82 to 42.22         | ns       | 0.8619        | Nicotine (0.5mM)                     |

|                                          |     |                 |    |        |                             |
|------------------------------------------|-----|-----------------|----|--------|-----------------------------|
| Positive vs. Oxaliplatin(1ng/ml)         | 4.9 | -65.12 to 74.92 | ns | 0.9997 | Oxaliplatin(1ng/ml)         |
| Positive vs. Propanoic acid<br>(10ug/ml) | 10  | -60.02 to 80.02 | ns | 0.9994 | Propanoic acid<br>(10ug/ml) |
| Positive vs. Sucrose (0.01%)             | 4.3 | -65.72 to 74.32 | ns | 0.9997 | Sucrose (0.01%)             |



**Supplementary Table 4**

Ranking of active compounds on specific cytokine assay in order with strongest cytokine production first

| Compounds                            | 95.00% CI of diff.      | Summary   | Adjusted P Value |                                    |
|--------------------------------------|-------------------------|-----------|------------------|------------------------------------|
| Oestradiol(10uM)                     | 560 to 697.8            | ****      | 0.0001           | Oestradiol(10uM)                   |
| D,L-Homotryptophan (1mg/ml)          | 247.6 to 385.4          | ****      | 0.0001           | D,L-Homotryptophan (1mg/ml)        |
| N-Acety-D-tryptophan (1mg/ml)        | 49.34 to 187.1          | ***       | 0.0002           | N-Acety-D-tryptophan (1mg/ml)      |
| Glycerol (1mM)                       | 35.94 to 173.7          | **        | 0.001            | Glycerol (1mM)                     |
| Aspartame(1mg/ml)                    | 27.24 to 165            | **        | 0.0028           | Aspartame(1mg/ml)                  |
| Oxaliplatin(1ng/ml)                  | -164.9 to -21.32        | **        | 0.0059           | Oxaliplatin(1ng/ml)                |
| Butanediol (0.175%)                  | 23.44 to 161.2          | **        | 0.0043           | Butanediol (0.175%)                |
| Nicotine (0.5mM)                     | 23.04 to 160.8          | **        | 0.0045           | Nicotine (0.5mM)                   |
| Sucrose (0.01%)                      | 14.94 to 152.7          | *         | 0.0108           | Sucrose (0.01%)                    |
|                                      |                         |           |                  |                                    |
|                                      |                         |           |                  |                                    |
| TGF beta                             |                         |           |                  |                                    |
| Butanediol (0.175%)                  | 42.62 to 210.8          | **        | 0.0013           | Butanediol (0.175%)                |
| Glycerol (1mM)                       | 7.217 to 175.4          | *         | 0.0281           | Glycerol (1mM)                     |
| <b>Malonic acid (1mM)</b>            | <b>-191.1 to -22.92</b> | <b>**</b> | <b>0.0075</b>    | <b>Malonic acid (1mM)</b>          |
| <b>N-Acety-D-tryptophan (1mg/ml)</b> | <b>-187.2 to -19.02</b> | <b>*</b>  | <b>0.0105</b>    | <b>N-Acety-D-tryptophan (1mg/m</b> |
|                                      |                         |           |                  |                                    |
|                                      |                         |           |                  |                                    |
| IL2 oxiplatin                        |                         |           |                  |                                    |
| Oxaliplatin(1ng/ml)                  | -243.8 to -124.2        | ****      | 0.0001           | Oxaliplatin(1ng/ml)                |
| Oxaliplatin(5ng/ml)                  | -135.4 to -15.79        | *         | 0.0144           | Oxaliplatin(5ng/ml)                |
